# Supplementary material for: Health Implications and Risk Assessment of Gestational Exposure to Polycyclic Aromatic Hydrocarbons in Mbarara, Uganda
Source: Research Square preprint supplement (doi:10.21203/rs.3.rs-7623027/v1), 2025-10-07
Supplement: Supplementary file 1 [file 752182a8de95dda043207c6a.docx]

# **Table S1: Toxic and mutagenic equivalency for different PAH congeners**

| **S/N** | **PAHs** | **Code** | **RfDk** | **TEFn** | **MEFr** |
| --- | --- | --- | --- | --- | --- |
| 1 | *Acenaphthene | AceN | 0.06 | 0.001 | - |
| 2 | *Acenapthylene | AcY | 0.06 | 0.001 | - |
| 3 | *Anthracene | AntE | 0.30 | 0.010 | - |
| 4 | ncFluoranthene | FluT | 0.04 | 0.001 | - |
| 5 | *Fluorene | FluE | 0.04 | 0.001 | - |
| 6 | *Naphthalene | NaP | 0.02 | 0.001 | - |
| 7 | *Phenanthrene | PheN | 0.30 | 0.001 | - |
| 8 | *Pyrene | PyR | 0.03 | 0.001 | - |
| 9 | **Benzo[a]pyrene | BaP | - | 1.000 | 1.000 |
| 10 | **Benzo[g,h,i]perylene | BpY | - | 0.010 | 0.190 |
| 11 | **Chrysene | ChrY | - | 0.010 | 0.017 |
| 12 | **Dibenz[a,h]anthracene | DbA | - | 5.000 | 0.290 |
| 13 | **Indeno[1,2,3-cd]pyrene | IcdP | - | 0.100 | 0.310 |
| 14 | **Benzo[b]fluoranthene | BfL | - | 0.100 | 0.250 |
| 15 | **Benzo[K]fluoranthene | BkL | - | 0.100 | 0.110 |
| 16 | **Benzo[a]anthracene | BaA | - | 0.100 | 0.082 |
| 17 | **Cyclopenta[c,d]pyrene | CdP | - | 1.000# | 1.000# |
| 18 | **Dibenzo[a,i]pyrene | DbP | - | 1.000# | 1.000# |
| 19 | 1-methylpyrene | MyP | - | 0.001 |  |
| 20 | *Biphenyl | BiP | 0.05 | 0.001 |  |
| 21 | Benzo[e]pyrene | BeP | 9E-05 | 0.01 |  |
| 22 | Naphthalene-d8 | NaP8 | - | 0.001 |  |
| 23 | Benzo(a,h)pyrene | BahP | 0.03 | 0.1 |  |
| 24 | *Biphenylene |  | - | - | - |

*Listed non-carcinogenic PAHs; **carcinogenic PAHs; ncnot classifiable; #≥ BaP; RfD: reference oral dose; kUSEPA (2012), nNisbet & LaGoy (1992), rDurant et al. (1996; 1999); TEF: toxic equivalent factor; MEF: mutagenic equivalent factor.


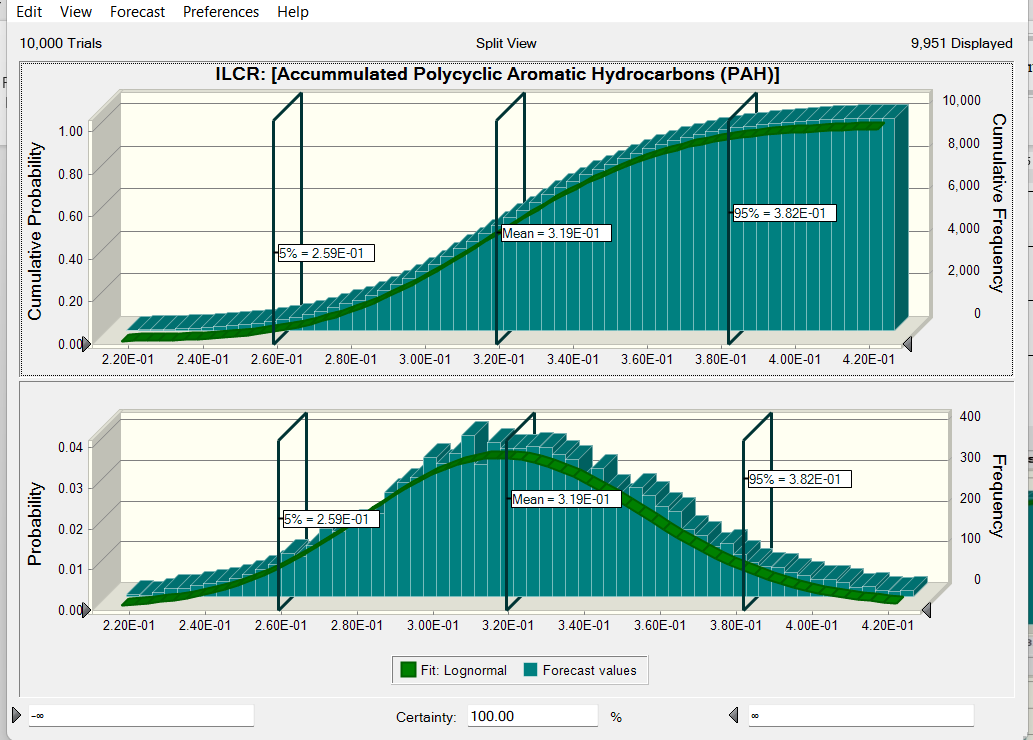


**Fig. S1a:** Simulated incremental lifetime cancer risk for cumulative PAHs


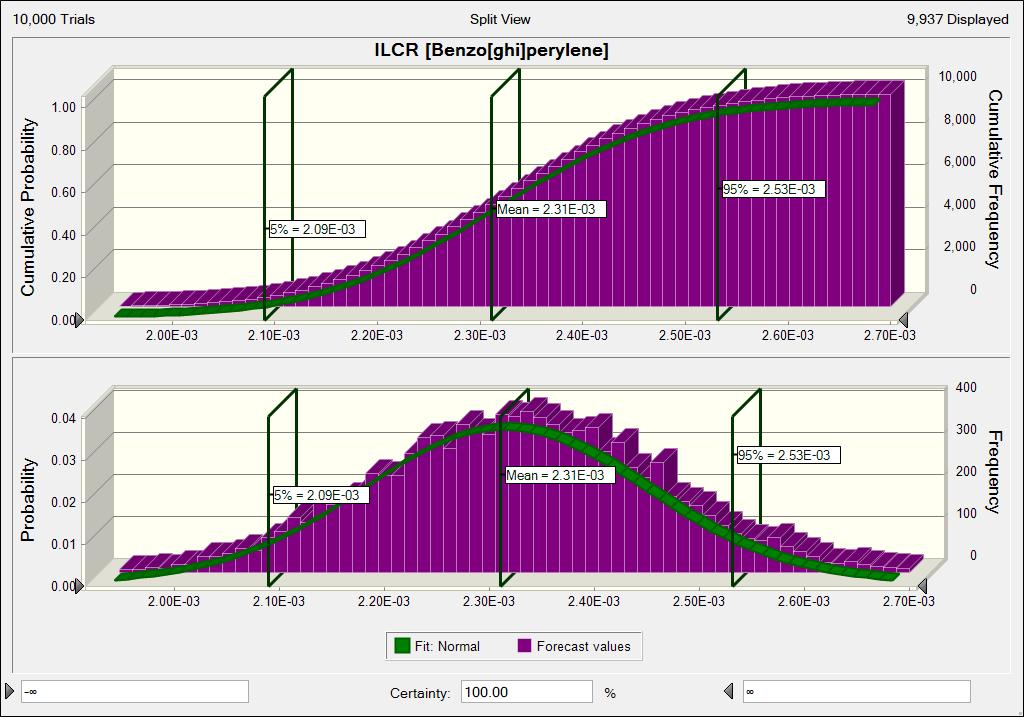


**Fig. S1b.** Simulated incremental lifetime cancer risk for Benzo[ghi]perylene


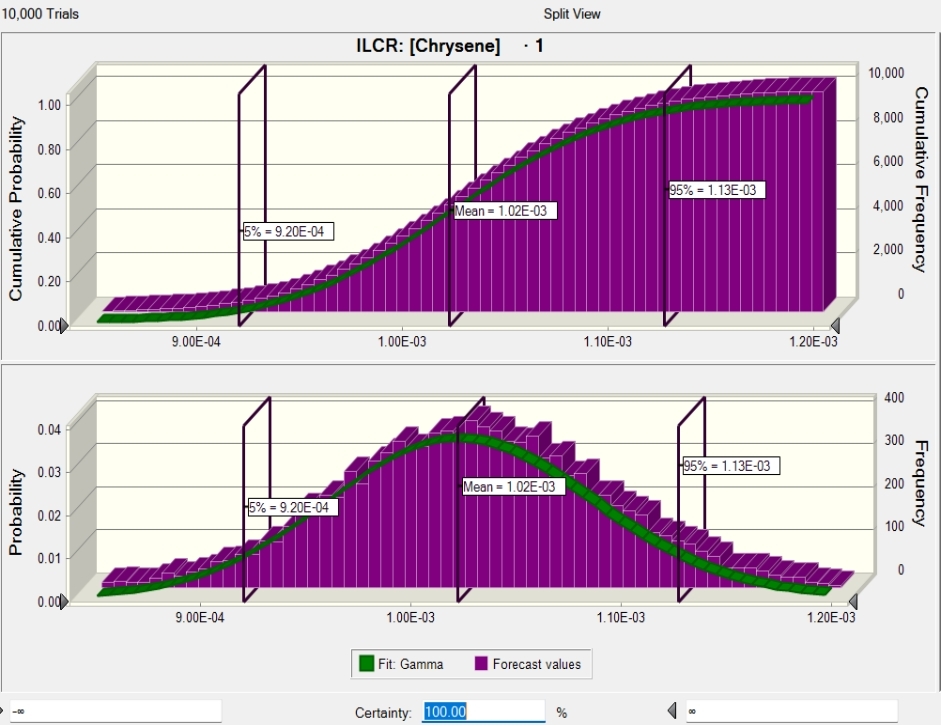


**Fig. S1c.** Simulated incremental lifetime cancer risk for Chrysene


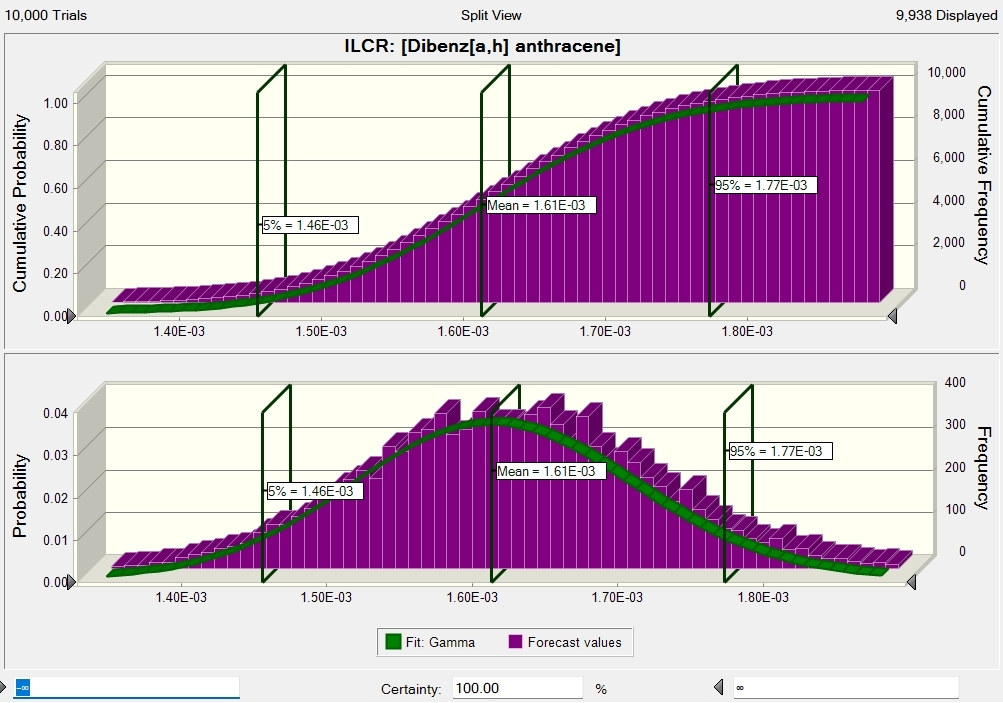


**Fig. S1d.** Simulated incremental lifetime cancer risk for Dibenz[a,h] anthracene


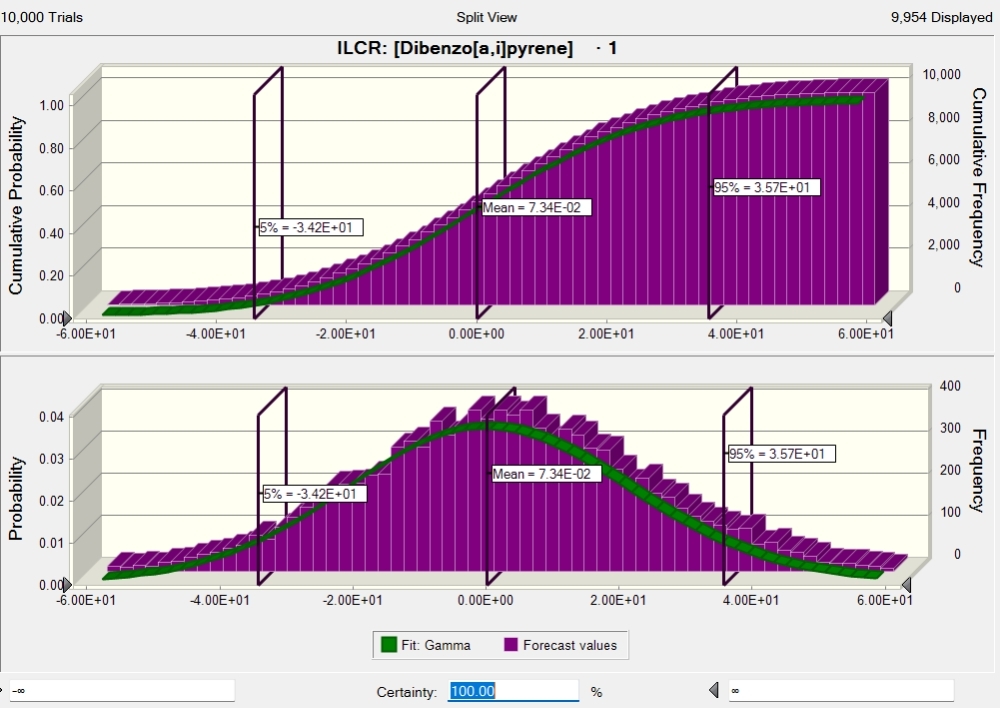


**Fig. S1d.** Simulated incremental lifetime cancer risk for Dibenzo[a,i]pyrene


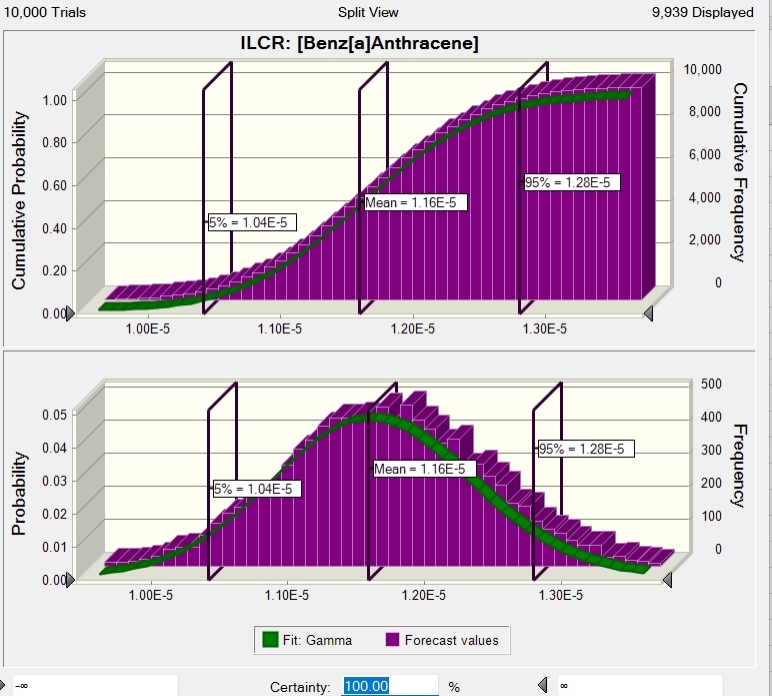


**Fig. S1e.** Simulated incremental lifetime cancer risk for Benz[a]Anthracene


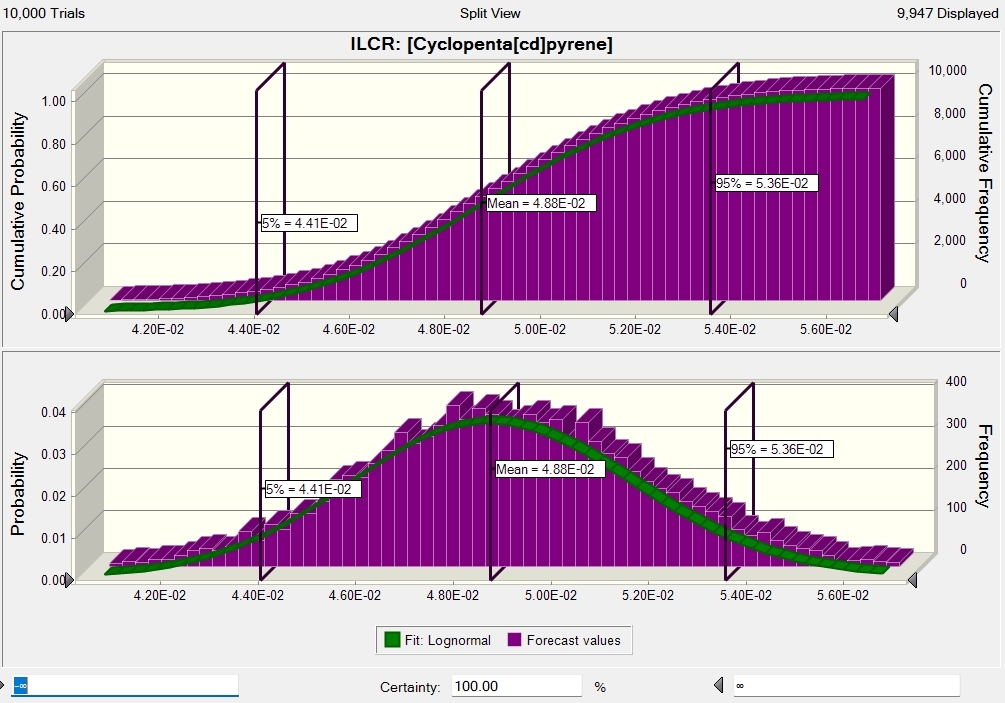
**Fig. S1f.** Simulated incremental lifetime cancer risk for Cyclopenta[cd]pyrene
